# Supplementary material for: Comorbidities and mortality among patients with chronic obstructive pulmonary disease
Source: PubMed Central journal article supplement — BMJ Open Respir Res. 2023 Oct 4;10(1):e001798. doi: 10.1136/bmjresp-2023-001798 (PMC10551998; doi:10.1136/bmjresp-2023-001798), 2023-10-04
Supplement: bmjresp-2023-001798supp001.pdf [file bmjresp-2023-001798supp001.pdf]

**SUPPLEMENTAL MATERIAL**

**Supplemental Table 1.** International Classification of Diseases (ICD) and Anatomical Therapeutic Chemical Classification System (ATC) codes definitions used in the study and their positive predictive values (PPVs) in the Danish registries.

| Condition                             | ICD-10 codes                                          | ATC codes                                                                                                   | PPV           |
|---------------------------------------|-------------------------------------------------------|-------------------------------------------------------------------------------------------------------------|---------------|
| Chronic obstructive pulmonary disease | J43-J44                                               |                                                                                                             | 92%[1]        |
| Smoking-related cancers               | C00-C06, C09-C22, C25, C32-C34, C39, C50, C65-C67     |                                                                                                             | 98%[2]        |
| Non-smoking-related cancers           | C00-C99 (excluding codes for smoking-related cancers) |                                                                                                             | 98%[2]        |
| Acute myocardial infarction           | I21                                                   |                                                                                                             | 97%[3]        |
| Heart failure                         | I50, I110, I130, I132                                 |                                                                                                             | 76%[3]        |
| Peripheral arterial disease           | I70-I74                                               |                                                                                                             | 69%[4]        |
| Stroke                                | I60-I64, I69                                          |                                                                                                             | 76-94%[2,5,6] |
| Venous thromboembolism                | I801-I803, I26                                        |                                                                                                             | 88%[3]        |
| Diabetes mellitus                     | E10-E14                                               | A10A, A10B ( $\geq 2$ prescriptions in last year before index/within one year for incident cases)           | 96%[2]        |
| Chronic liver disease                 | K70-K74, K766, I85                                    |                                                                                                             | 100%[2]       |
| Ulcer/chronic gastritis               | K211, K25-K28, K293-K295                              |                                                                                                             | 98%[2]        |
| Inflammatory bowel disease            | K50-K51                                               |                                                                                                             | 82%[7]        |
| Chronic kidney disease                | N18                                                   |                                                                                                             | 100%[2]       |
| Prostate disorders                    | N40                                                   | C02CA, G04C ( $\geq 2$ prescriptions in last year before index/within one year for incident cases)          |               |
| Connective tissue disorders           | M05-M06, M08-M09, M30-M36, D86                        |                                                                                                             | 98%[2]        |
| Osteoporosis/hip fractures            | M80-M82, S720, S721, S722                             | M05B, G03XC01, H05AA ( $\geq 2$ prescriptions in last year before index/within one year for incident cases) | >90%[8]       |

|                                            |                             |                                                                                             |             |
|--------------------------------------------|-----------------------------|---------------------------------------------------------------------------------------------|-------------|
| Migraine                                   | G43                         | N02C ( $\geq 2$ prescriptions in last year before index/within one year for incident cases) | Unknown     |
| Dementia                                   | F00-F03, F051, G30          | N06D ( $\geq 2$ prescriptions in last year before index/within one year for incident cases) | 86-98%[2,9] |
| Mood, stress-related, or anxiety disorders | F32-F34, F40-F48            | N06A ( $\geq 2$ prescriptions in last year before index/within one year for incident cases) | 65-83%[10]  |
| Alcohol or substance abuse disorders       | F101-F109, F11-F16, F18-F19 |                                                                                             | Unknown     |
| Bipolar affective disorders                | F30-F31                     |                                                                                             | Unknown     |
| Schizophrenia                              | F20, F25                    |                                                                                             | 97%[11]     |

**Supplemental Figure 1.** Five-year absolute risks among patients with chronic obstructive pulmonary disease (COPD), risk differences (RDs), and subdistribution hazard ratios (SHRs) for a spectrum of comorbidities, ranked according to the largest RD, comparing patients with COPD with matched individuals from the general population, stratified according to sex.

| Comorbidity                                | 5-year risk among COPD patients, % (95% CI) |  | RD, % (95% CI)       |   | SHR (95% CI)      |
|--------------------------------------------|---------------------------------------------|--|----------------------|---|-------------------|
| Mood, stress-related, or anxiety disorders |                                             |  |                      |   |                   |
| Men                                        | 12.34 (12.05, 12.63)                        |  | 5.11 (4.79, 5.44)    | * | 1.86 (1.81, 1.91) |
| Women                                      | 15.39 (15.05, 15.73)                        |  | 6.21 (5.83, 6.59)    | * | 1.83 (1.78, 1.88) |
| Osteoporosis/hip fracture                  |                                             |  |                      |   |                   |
| Men                                        | 8.05 (7.83, 8.29)                           |  | 4.20 (3.95, 4.45)    | * | 2.18 (2.11, 2.26) |
| Women                                      | 15.60 (15.27, 15.93)                        |  | 6.87 (6.51, 7.25)    | * | 1.86 (1.82, 1.91) |
| Heart failure                              |                                             |  |                      |   |                   |
| Men                                        | 8.53 (8.29, 8.77)                           |  | 4.54 (4.27, 4.80)    | * | 2.33 (2.26, 2.41) |
| Women                                      | 6.23 (6.03, 6.44)                           |  | 3.83 (3.61, 4.04)    | * | 2.83 (2.72, 2.94) |
| Peripheral artery occlusive disease        |                                             |  |                      |   |                   |
| Men                                        | 6.14 (5.93, 6.35)                           |  | 2.74 (2.51, 2.97)    | * | 1.89 (1.82, 1.96) |
| Women                                      | 4.61 (4.44, 4.79)                           |  | 2.68 (2.49, 2.87)    | * | 2.50 (2.39, 2.61) |
| Smoking-related cancers                    |                                             |  |                      |   |                   |
| Men                                        | 6.52 (6.32, 6.73)                           |  | 2.75 (2.52, 2.98)    | * | 1.83 (1.77, 1.89) |
| Women                                      | 7.00 (6.79, 7.22)                           |  | 2.85 (2.61, 3.09)    | * | 1.77 (1.72, 1.83) |
| Diabetes mellitus                          |                                             |  |                      |   |                   |
| Men                                        | 6.60 (6.39, 6.83)                           |  | 1.94 (1.69, 2.19)    | * | 1.47 (1.42, 1.52) |
| Women                                      | 5.08 (4.89, 5.27)                           |  | 2.00 (1.80, 2.21)    | * | 1.70 (1.63, 1.77) |
| Chronic kidney disease                     |                                             |  |                      |   |                   |
| Men                                        | 3.88 (3.73, 4.05)                           |  | 1.54 (1.36, 1.71)    | * | 1.74 (1.66, 1.81) |
| Women                                      | 2.53 (2.41, 2.66)                           |  | 1.36 (1.22, 1.50)    | * | 2.23 (2.12, 2.36) |
| Ulcer/chronic gastritis                    |                                             |  |                      |   |                   |
| Men                                        | 2.93 (2.79, 3.08)                           |  | 1.40 (1.25, 1.56)    | * | 1.99 (1.89, 2.09) |
| Women                                      | 2.67 (2.53, 2.80)                           |  | 1.28 (1.14, 1.43)    | * | 2.00 (1.90, 2.12) |
| Venous thromboembolism                     |                                             |  |                      |   |                   |
| Men                                        | 3.02 (2.88, 3.16)                           |  | 1.23 (1.07, 1.38)    | * | 1.77 (1.68, 1.86) |
| Women                                      | 3.19 (3.05, 3.34)                           |  | 1.47 (1.32, 1.63)    | * | 1.94 (1.85, 2.04) |
| Stroke                                     |                                             |  |                      |   |                   |
| Men                                        | 5.59 (5.39, 5.79)                           |  | 0.73 (0.50, 0.96)    | * | 1.16 (1.12, 1.21) |
| Women                                      | 5.08 (4.89, 5.26)                           |  | 1.06 (0.85, 1.27)    | * | 1.28 (1.23, 1.33) |
| Alcohol or substance abuse disorders       |                                             |  |                      |   |                   |
| Men                                        | 2.34 (2.21, 2.47)                           |  | 1.49 (1.35, 1.63)    | * | 2.85 (2.68, 3.04) |
| Women                                      | 1.29 (1.20, 1.38)                           |  | 0.86 (0.77, 0.96)    | * | 3.13 (2.88, 3.41) |
| Prostate disorders                         |                                             |  |                      |   |                   |
| Men                                        | 8.81 (8.56, 9.07)                           |  | 0.52 (0.22, 0.82)    | * | 1.07 (1.03, 1.10) |
| Women                                      | 0.39 (0.35, 0.44)                           |  | 0.15 (0.09, 0.20)    | * | 1.65 (1.45, 1.88) |
| Acute myocardial infarction                |                                             |  |                      |   |                   |
| Men                                        | 2.96 (2.82, 3.11)                           |  | 0.48 (0.32, 0.65)    | * | 1.23 (1.17, 1.30) |
| Women                                      | 2.37 (2.24, 2.49)                           |  | 1.06 (0.93, 1.20)    | * | 1.87 (1.77, 1.98) |
| Chronic liver disease                      |                                             |  |                      |   |                   |
| Men                                        | 1.53 (1.43, 1.63)                           |  | 0.96 (0.86, 1.07)    | * | 2.84 (2.63, 3.05) |
| Women                                      | 1.00 (0.92, 1.08)                           |  | 0.60 (0.52, 0.69)    | * | 2.61 (2.39, 2.85) |
| Connective tissue disorders                |                                             |  |                      |   |                   |
| Men                                        | 1.33 (1.24, 1.43)                           |  | 0.19 (0.08, 0.30)    | * | 1.19 (1.11, 1.28) |
| Women                                      | 1.76 (1.66, 1.87)                           |  | 0.17 (0.04, 0.29)    | * | 1.14 (1.07, 1.21) |
| Dementia                                   |                                             |  |                      |   |                   |
| Men                                        | 2.81 (2.68, 2.95)                           |  | -0.53 (-0.69, -0.36) | * | 0.85 (0.81, 0.89) |
| Women                                      | 3.24 (3.10, 3.38)                           |  | -0.35 (-0.52, -0.18) | * | 0.89 (0.85, 0.93) |
| Non-smoking-related cancers                |                                             |  |                      |   |                   |
| Men                                        | 5.06 (4.88, 5.25)                           |  | -1.57 (-1.80, -1.34) | * | 0.77 (0.74, 0.80) |
| Women                                      | 3.11 (2.97, 3.26)                           |  | -0.53 (-0.70, -0.36) | * | 0.87 (0.83, 0.91) |

**Supplemental Figure 2.** Five-year absolute risks among patients with chronic obstructive pulmonary disease (COPD), risk differences (RDs), and subdistribution hazard ratios (SHRs) for a spectrum of comorbidities, ranked according to the largest RD, comparing patients with COPD with matched individuals from the general population, stratified according to age group.

| Comorbidity                                       | 5-year risk among COPD patients, % (95% CI) | RD, % (95% CI)           | SHR (95% CI) |
|---------------------------------------------------|---------------------------------------------|--------------------------|--------------|
| <b>Mood, stress-related, or anxiety disorders</b> |                                             |                          |              |
| Age 40-59 years                                   | 14.52 (13.96, 15.08)                        | +++ 8.52 (7.92, 9.13)    | *            |
| Age 60-69 years                                   | 12.27 (11.86, 12.69)                        | ++ 7.06 (6.61, 7.51)     | *            |
| Age 70-79 years                                   | 14.60 (14.21, 15.01)                        | +++ 5.91 (5.46, 6.36)    | *            |
| Age ≥80 years                                     | 13.79 (13.34, 14.25)                        | +++ 1.39 (0.86, 1.93)    | *            |
| <b>Osteoporosis/hip fracture</b>                  |                                             |                          |              |
| Age 40-59 years                                   | 7.90 (7.53, 8.27)                           | ++ 5.95 (5.57, 6.34)     | ++           |
| Age 60-69 years                                   | 11.48 (11.11, 11.86)                        | +++ 7.22 (6.82, 7.63)    | *            |
| Age 70-79 years                                   | 13.26 (12.89, 13.65)                        | +++ 6.08 (5.66, 6.50)    | *            |
| Age ≥80 years                                     | 12.62 (12.17, 13.08)                        | +++ 1.04 (0.51, 1.58)    | *            |
| <b>Heart failure</b>                              |                                             |                          |              |
| Age 40-59 years                                   | 3.49 (3.25, 3.75)                           | ++ 2.79 (2.54, 3.06)     | +++          |
| Age 60-69 years                                   | 6.10 (5.83, 6.38)                           | ++ 4.37 (4.08, 4.67)     | ++           |
| Age 70-79 years                                   | 8.79 (8.49, 9.10)                           | +++ 5.07 (4.74, 5.40)    | *            |
| Age ≥80 years                                     | 10.45 (10.06, 10.86)                        | +++ 3.64 (3.19, 4.09)    | *            |
| <b>Peripheral artery disease</b>                  |                                             |                          |              |
| Age 40-59 years                                   | 2.97 (2.74, 3.21)                           | ++ 2.07 (1.83, 2.32)     | +++          |
| Age 60-69 years                                   | 5.85 (5.58, 6.13)                           | ++ 3.58 (3.29, 3.88)     | *            |
| Age 70-79 years                                   | 7.14 (6.86, 7.42)                           | +++ 3.51 (3.20, 3.82)    | *            |
| Age ≥80 years                                     | 4.46 (4.20, 4.73)                           | +++ 1.06 (0.77, 1.36)    | *            |
| <b>Smoking-related cancers</b>                    |                                             |                          |              |
| Age 40-59 years                                   | 4.17 (3.90, 4.45)                           | ++ 2.32 (2.03, 2.62)     | *            |
| Age 60-69 years                                   | 8.13 (7.82, 8.46)                           | +++ 4.00 (3.66, 4.35)    | *            |
| Age 70-79 years                                   | 8.66 (8.36, 8.96)                           | +++ 3.76 (3.43, 4.09)    | *            |
| Age ≥80 years                                     | 4.83 (4.57, 5.09)                           | ++ 0.40 (0.10, 0.71)     | *            |
| <b>Diabetes mellitus</b>                          |                                             |                          |              |
| Age 40-59 years                                   | 6.96 (6.61, 7.33)                           | ++ 3.58 (3.19, 3.98)     | *            |
| Age 60-69 years                                   | 6.92 (6.62, 7.22)                           | +++ 2.72 (2.38, 3.06)    | *            |
| Age 70-79 years                                   | 6.02 (5.76, 6.29)                           | ++ 1.66 (1.37, 1.96)     | *            |
| Age ≥80 years                                     | 3.34 (3.12, 3.57)                           | ++ 0.27 (0.01, 0.53)     | *            |
| <b>Chronic kidney disease</b>                     |                                             |                          |              |
| Age 40-59 years                                   | 1.23 (1.09, 1.39)                           | *                        |              |
| Age 60-69 years                                   | 2.45 (2.29, 2.63)                           | ++ 1.55 (1.37, 1.73)     | +++          |
| Age 70-79 years                                   | 4.12 (3.92, 4.32)                           | ++ 1.94 (1.72, 2.16)     | *            |
| Age ≥80 years                                     | 4.41 (4.17, 4.66)                           | ++ 1.04 (0.77, 1.32)     | *            |
| <b>Ulcer/chronic gastritis</b>                    |                                             |                          |              |
| Age 40-59 years                                   | 2.27 (2.07, 2.48)                           | ++ 1.60 (1.40, 1.82)     | +++          |
| Age 60-69 years                                   | 2.85 (2.66, 3.04)                           | ++ 1.78 (1.58, 1.98)     | *            |
| Age 70-79 years                                   | 3.26 (3.08, 3.45)                           | ++ 1.54 (1.34, 1.74)     | *            |
| Age ≥80 years                                     | 2.54 (2.35, 2.73)                           | ++ 0.32 (0.10, 0.54)     | *            |
| <b>Venous thromboembolism</b>                     |                                             |                          |              |
| Age 40-59 years                                   | 2.13 (1.94, 2.34)                           | *                        |              |
| Age 60-69 years                                   | 3.15 (2.95, 3.35)                           | ++ 1.80 (1.59, 2.01)     | +++          |
| Age 70-79 years                                   | 3.58 (3.39, 3.77)                           | ++ 1.50 (1.29, 1.72)     | *            |
| Age ≥80 years                                     | 3.19 (2.99, 3.41)                           | ++ 0.57 (0.34, 0.82)     | *            |
| <b>Stroke</b>                                     |                                             |                          |              |
| Age 40-59 years                                   | 3.00 (2.78, 3.24)                           | ++ 1.70 (1.46, 1.96)     | ++           |
| Age 60-69 years                                   | 4.88 (4.64, 5.14)                           | +++ 2.03 (1.76, 2.31)    | *            |
| Age 70-79 years                                   | 6.28 (6.02, 6.55)                           | +++ 1.01 (0.71, 1.31)    | *            |
| Age ≥80 years                                     | 6.63 (6.32, 6.95)                           | +++ -1.90 (-2.29, -1.50) | *            |
| <b>Alcohol or substance abuse disorders</b>       |                                             |                          |              |
| Age 40-59 years                                   | 3.39 (3.13, 3.67)                           | +++ 2.77 (2.50, 3.05)    | +++          |
| Age 60-69 years                                   | 2.60 (2.42, 2.79)                           | ++ 1.79 (1.60, 1.99)     | +++          |
| Age 70-79 years                                   | 1.36 (1.24, 1.48)                           | *                        |              |
| Age ≥80 years                                     | 0.53 (0.45, 0.62)                           | *                        |              |
| <b>Prostate disorders</b>                         |                                             |                          |              |
| Age 40-59 years                                   | 2.00 (1.82, 2.19)                           | ++ 0.53 (0.32, 0.74)     | *            |
| Age 60-69 years                                   | 4.58 (4.35, 4.83)                           | ++ 0.73 (0.46, 1.00)     | *            |
| Age 70-79 years                                   | 5.48 (5.24, 5.72)                           | ++ 0.71 (0.44, 1.00)     | *            |
| Age ≥80 years                                     | 3.53 (3.31, 3.77)                           | ++ 0.25 (-0.02, 0.53)    | *            |
| <b>Acute myocardial infarction</b>                |                                             |                          |              |
| Age 40-59 years                                   | 1.80 (1.63, 1.99)                           | ++ 0.86 (0.67, 1.07)     | ++           |
| Age 60-69 years                                   | 2.56 (2.39, 2.75)                           | ++ 1.12 (0.93, 1.32)     | ++           |
| Age 70-79 years                                   | 3.06 (2.88, 3.25)                           | ++ 0.92 (0.72, 1.13)     | *            |
| Age ≥80 years                                     | 2.91 (2.71, 3.12)                           | ++ 0.09 (-0.15, 0.34)    | *            |
| <b>Chronic liver disease</b>                      |                                             |                          |              |
| Age 40-59 years                                   | 2.28 (2.09, 2.49)                           | ++ 1.81 (1.61, 2.02)     | +++          |
| Age 60-69 years                                   | 1.76 (1.62, 1.91)                           | ++ 1.13 (0.97, 1.29)     | +++          |
| Age 70-79 years                                   | 0.94 (0.85, 1.04)                           | *                        |              |
| Age ≥80 years                                     | 0.37 (0.31, 0.45)                           | *                        |              |
| <b>Connective tissue disorders</b>                |                                             |                          |              |
| Age 40-59 years                                   | 1.45 (1.29, 1.62)                           | *                        |              |
| Age 60-69 years                                   | 1.63 (1.50, 1.78)                           | ++ 0.68 (0.51, 0.86)     | ++           |
| Age 70-79 years                                   | 1.93 (1.79, 2.07)                           | ++ 0.29 (0.13, 0.46)     | *            |
| Age ≥80 years                                     | 1.00 (0.89, 1.13)                           | *                        |              |
| <b>Dementia</b>                                   |                                             |                          |              |
| Age 40-59 years                                   | 0.37 (0.29, 0.46)                           | *                        |              |
| Age 60-69 years                                   | 1.26 (1.14, 1.39)                           | ++ 0.40 (0.27, 0.54)     | *            |
| Age 70-79 years                                   | 3.97 (3.77, 4.18)                           | ++ -0.17 (-0.40, 0.07)   | *            |
| Age ≥80 years                                     | 6.13 (5.84, 6.42)                           | +++ -2.90 (-3.26, -2.54) | *            |
| <b>Non-smoking-related cancers</b>                |                                             |                          |              |
| Age 40-59 years                                   | 2.27 (2.07, 2.48)                           | ++ 0.25 (0.03, 0.49)     | *            |
| Age 60-69 years                                   | 4.30 (4.07, 4.53)                           | ++ -0.43 (-0.70, -0.15)  | *            |
| Age 70-79 years                                   | 4.99 (4.76, 5.22)                           | +++ -1.60 (-1.88, -1.32) | *            |
| Age ≥80 years                                     | 3.99 (3.76, 4.24)                           | +++ -2.24 (-2.54, -1.93) | *            |

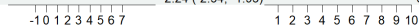

**Supplemental Figure 3.** Five-year absolute risks among patients with chronic obstructive pulmonary disease (COPD), risk differences (RDs), and subdistribution hazard ratios (SHRs) for a spectrum of comorbidities, ranked according to the largest RD, comparing patients with COPD with matched individuals from the general population, after restricting the study population to those with  $\geq 2$  visits to a general practitioner within one year before the index date.

| Comorbidity                                | 5-year risk among COPD patients, % (95% CI) | RD, % (95% CI)       | SHR (95% CI)      |
|--------------------------------------------|---------------------------------------------|----------------------|-------------------|
| Mood, stress-related, or anxiety disorders | 13.88 (13.66, 14.11)                        | 4.90 (4.64, 5.16)    | 1.69 (1.65, 1.72) |
| Osteoporosis/hip fracture                  | 11.66 (11.45, 11.86)                        | 5.10 (4.87, 5.33)    | 1.86 (1.83, 1.90) |
| Heart failure                              | 7.43 (7.27, 7.59)                           | 3.99 (3.81, 4.17)    | 2.41 (2.35, 2.48) |
| Peripheral artery occlusive disease        | 5.40 (5.26, 5.54)                           | 2.56 (2.41, 2.72)    | 1.99 (1.94, 2.05) |
| Smoking-related cancers                    | 6.74 (6.59, 6.90)                           | 2.65 (2.48, 2.82)    | 1.74 (1.70, 1.79) |
| Diabetes mellitus                          | 5.82 (5.67, 5.96)                           | 1.81 (1.65, 1.98)    | 1.45 (1.42, 1.50) |
| Chronic kidney disease                     | 3.25 (3.15, 3.36)                           | 1.30 (1.18, 1.41)    | 1.79 (1.73, 1.85) |
| Ulcer/chronic gastritis                    | 2.80 (2.70, 2.90)                           | 1.20 (1.09, 1.31)    | 1.84 (1.77, 1.91) |
| Venous thromboembolism                     | 3.12 (3.02, 3.22)                           | 1.27 (1.15, 1.38)    | 1.78 (1.72, 1.84) |
| Stroke                                     | 5.37 (5.24, 5.52)                           | 0.68 (0.51, 0.84)    | 1.19 (1.15, 1.22) |
| Alcohol or substance abuse disorders       | 1.75 (1.67, 1.83)                           | 1.13 (1.04, 1.21)    | 2.78 (2.64, 2.94) |
| Prostate disorders                         | 4.16 (4.04, 4.29)                           | 0.46 (0.32, 0.61)    | 1.03 (1.00, 1.06) |
| Acute myocardial infarction                | 2.67 (2.57, 2.77)                           | 0.72 (0.61, 0.84)    | 1.42 (1.37, 1.48) |
| Chronic liver disease                      | 1.25 (1.18, 1.31)                           | 0.74 (0.68, 0.82)    | 2.51 (2.36, 2.66) |
| Connective tissue disorders                | 1.57 (1.50, 1.65)                           | 0.10 (0.02, 0.19)    | 1.10 (1.05, 1.15) |
| Dementia                                   | 3.11 (3.01, 3.21)                           | -0.74 (-0.86, -0.61) | 0.85 (0.82, 0.88) |
| Non-smoking-related cancers                | 4.09 (3.97, 4.21)                           | -1.20 (-1.35, -1.05) | 0.79 (0.77, 0.81) |

## Supplemental References

- 1 Thomsen RW, Lange P, Hellquist B, *et al.* Validity and underrecording of diagnosis of COPD in the Danish National Patient Registry. *Respir Med* 2011;**105**:1063–8. doi:10.1016/j.rmed.2011.01.012
- 2 Thygesen SK, Christiansen CF, Christensen S, *et al.* The predictive value of ICD-10 diagnostic coding used to assess Charlson comorbidity index conditions in the population-based Danish National Registry of Patients. *BMC Med Res Methodol* 2011;**11**:83. doi:10.1186/1471-2288-11-83
- 3 Sundbøll J, Adelborg K, Munch T, *et al.* Positive predictive value of cardiovascular diagnoses in the Danish National Patient Registry: a validation study. *BMJ Open* 2016;**6**. doi:10.1136/bmjopen-2016-012832
- 4 Lasota AN, Overvad K, Eriksen HH, *et al.* Validity of Peripheral Arterial Disease Diagnoses in the Danish National Patient Registry. *Eur J Vasc Endovasc Surg* 2017;**53**:679–85. doi:10.1016/j.ejvs.2016.12.031
- 5 Wildenschild C, Mehnert F, Thomsen RW, *et al.* Registration of acute stroke: validity in the Danish Stroke Registry and the Danish National Registry of Patients. *Clin Epidemiol* 2013;**6**:27–36. doi:10.2147/CLEP.S50449
- 6 Hald SM, Kring Sloth C, Hey SM, *et al.* Intracerebral hemorrhage: positive predictive value of diagnosis codes in two nationwide Danish registries. *Clin Epidemiol* 2018;**10**:941–8. doi:10.2147/CLEP.S167576
- 7 Albaek Jacobsen H, Jess T, Larsen L. Validity of Inflammatory Bowel Disease Diagnoses in the Danish National Patient Registry: A Population-Based Study from the North Denmark Region. *Clin Epidemiol* 2022;**14**:1099–109. doi:10.2147/CLEP.S378003
- 8 Hjelholt TJ, Edwards NM, Vesterager JD, *et al.* The Positive Predictive Value of Hip Fracture Diagnoses and Surgical Procedure Codes in the Danish Multidisciplinary Hip Fracture Registry and the Danish National Patient Registry. *Clin Epidemiol* 2020;**12**:123–31. doi:10.2147/CLEP.S238722
- 9 Phung TKT, Andersen BB, Høgh P, *et al.* Validity of dementia diagnoses in the Danish hospital registers. *Dement Geriatr Cogn Disord* 2007;**24**:220–8. doi:10.1159/000107084
- 10 Bock C, Bukh JD, Vinberg M, *et al.* Validity of the diagnosis of a single depressive episode in a case register. *Clin Pract Epidemiol Ment Health* 2009;**5**:4. doi:10.1186/1745-0179-5-4
- 11 Uggerby P, Østergaard SD, Røge R, *et al.* The validity of the schizophrenia diagnosis in the Danish Psychiatric Central Research Register is good. *Dan Med J* 2013;**60**:A4578.
